# Supplementary material for: Time-dependent multivariate and spectroscopic characterisation of oil residue in Niger Delta soil
Source: Royal Society of Chemistry journal article supplement (doi:10.1039/d2ra01187e), 2022-01-01
Supplement: d2ra01187e1.pdf [file d2ra01187e1.pdf]

## Time-dependent multivariate and spectroscopic characterization of oil residue in Niger

### Delta soil

Nnamdi David Menkiti <sup>ab</sup>, Chukwuemeka Isanbor <sup>†b</sup>, Olusegun Ayejuyo <sup>b</sup>, Louis Korbla  
Doamekpor <sup>c</sup>, Emmanuel Osei Twum <sup>c</sup>

- 
- a.* Department of Chemistry, Ahmadu Bello University, Zaria, Nigeria.  
E-mail: ndmenkiti@abu.edu.ng
- b.* Department of Chemistry, University of Lagos, Akoka, Nigeria  
E-mail: [cisanbor@unilag.edu.ng](mailto:cisanbor@unilag.edu.ng), [oayejuyo@unilag.edu.ng](mailto:oayejuyo@unilag.edu.ng)
- c.* Department of Chemistry, University of Ghana, Legon, Ghana

### Supporting information

**Table S1** Structural spectrometric indices obtained from Infrared region (Permanyer et al.,)<sup>1</sup>

---

| Structures indices | Formulae                                                                                               |
|--------------------|--------------------------------------------------------------------------------------------------------|
| Aromatic index     | $A_{1600} / \sum A$                                                                                    |
| Aliphatic index    | $(A_{1600} + A_{1376}) / \sum A$                                                                       |
| Branched index     | $A_{1376} / (A_{1460} + A_{1376})$                                                                     |
| Long-chain index   | $A_{724} / (A_{1460} + A_{1376}(\text{Aliphatic structures}))$                                         |
| Carbonyl index     | $A_{1700} / \sum A$                                                                                    |
| Sulfoxide index    | $A_{1030} / \sum A_{(\text{Oxygenated function})}$                                                     |
| $\sum A$           | $A_{1700} + A_{1600} + A_{1460} + A_{1376} + A_{1030} + A_{846} + A_{814} + A_{743} + A_{724} + \dots$ |

---

\* The subscripts represent the wavenumbers under which the areas were obtained,  $\sum A =$  The sum of areas identified in the spectrum.

**Table S2.** UV absorption maxima and absorption ratios for oil residues

| Samples | Age of spill (yrs) | $\lambda_1$ (nm) | $\lambda_2$ (nm) | $A_{205}/A_{215}$ | $A_{228}/A_{256}$ | $A_{248}/A_{267}$ | $A_{248}/A_{278}$ |
|---------|--------------------|------------------|------------------|-------------------|-------------------|-------------------|-------------------|
| S1      | 10                 | 228              | 278              | 1.413             | 1.477             | 0.817             | 0.849             |
| S2      | 10                 | 228              | 274              | 1.440             | 1.364             | 0.747             | 0.751             |
| S3      | 8                  | 226              | 264              | 1.418             | 1.466             | 0.975             | 1.084             |
| S4      | 5                  | 226              | 258              | 1.483             | 1.477             | 0.983             | 1.094             |
| S5      | 2                  | 226              | 272              | 1.525             | 1.234             | 0.798             | 0.802             |
| S6      | 1                  | 228              | 262              | 1.213             | 1.532             | 0.823             | 0.875             |
| B1      | 1                  | 230              | 254              | 1.485             | 1.898             | 1.204             | 1.481             |
| B2      | 1                  | 230              | 258              | 1.485             | 1.514             | 0.979             | 1.092             |
| FC      | NA                 | 224              | 256              | 1.434             | 2.946             | 1.000             | 1.281             |

**Table S3.** Assignment of IR absorption bands.

| Wavelength<br>(cm <sup>-1</sup> ) | Assignment                                                                                         |
|-----------------------------------|----------------------------------------------------------------------------------------------------|
| 3425                              | $\nu$ (N-H), H-bond pyrrollic group                                                                |
| 3400                              | $\nu$ (O-H), inter H-bonded, broad band                                                            |
| 3040                              | $\nu$ (C-H) <sub>ar</sub> , aromatic or unsaturated                                                |
| 2920,2850                         | $\nu$ (C-H), of aliphatic CH <sub>2</sub> and CH <sub>3</sub>                                      |
| 1775                              | $\nu$ (C=O), ester with electron-withdrawing group attached to single-bonded oxygen, like Ar-C-O-R |
| 1735*                             | $\nu$ (C=O), ester                                                                                 |
| 1720-1690*                        | $\nu$ (C=O), ketone, aldehyde, carboxylic                                                          |
| 1650-1630*                        | $\nu$ (C=O), highly conjugated ketone Ar-CO-R                                                      |
| 1600                              | $\nu$ (C=C), aromatic                                                                              |
| 1590-1560                         | $\nu$ (COO <sup>-</sup> carboxylic salt)                                                           |
| 1490*                             | Aromatic ring stretch frequency                                                                    |
| 1450                              | $\delta$ (CH <sub>2</sub> + CH <sub>3</sub> ), bending vibrations                                  |
| 1375                              | $\delta$ (CH <sub>3</sub> ), bending vibrations                                                    |
| 1300-1100*                        | $\nu$ (C-O) and $\nu$ (O-H), in phenoxy structure, ethers and vibrations of –S-linkages            |
| 1100-1000                         | $\nu$ (C-O), aliphatic ether, alcohol                                                              |
| 1030                              | (S=O) Sulphoxide                                                                                   |
| 875                               | $\gamma$ (CH <sub>ar1</sub> ), isolated aromatic H                                                 |
| 810-5                             | $\gamma$ (CH <sub>ar2,3</sub> ), isolated two and/or three H on aromatic ring                      |
| 750                               | $\gamma$ (CH <sub>ar4</sub> ), 1,2 substituted, 4 neighbouring H                                   |
| 784*                              | $\tau$ (CH <sub>2</sub> ) <sub>n, n&lt;4</sub> , alkyl chain                                       |
| 720                               | $\tau$ (CH <sub>2</sub> ) <sub>n, n&gt;4</sub> , alkyl chain                                       |

\*Very weak shoulder band to nearby broad base band

**Table S4** Spectrometric index calculated from IR region

|    | Aromatic Index | Aliphatic Index | Branched Index | Long chain Index | Carbonyl Index | Sulfoxide Index | $\sum A$ |
|----|----------------|-----------------|----------------|------------------|----------------|-----------------|----------|
| S1 | 0.04           | 0.04            | 0.82           | 2.66             | 0.02           | 0.06            | 57.99    |
| S2 | 0.01           | 0.05            | 0.89           | 3.19             | 0.01           | 0.06            | 55.20    |
| S3 | 0.02           | 0.05            | 0.88           | 2.59             | 0.01           | 0.06            | 56.89    |
| S4 | 0.01           | 0.05            | 0.88           | 2.89             | 0.00           | 0.06            | 55.83    |
| S5 | 0.02           | 0.05            | 0.91           | 2.58             | 0.03           | 0.06            | 58.43    |
| S6 | 0.02           | 0.04            | 0.79           | 2.37             | 0.02           | 0.06            | 56.85    |
| B1 | 0.01           | 0.05            | 0.88           | 3.00             | 0.02           | 0.01            | 48.38    |
| B2 | 0.01           | 0.06            | 0.88           | 3.69             | 0.03           | 0.01            | 48.75    |
| FC | 0.04           | 0.04            | 0.82           | 2.98             | 0.00           | 0.06            | 53.36    |

**Table S5** Gas chromatography weathering index

| Sample* | Time of spill (years) | Pr/Ph | Pr/n-C <sub>17</sub> | Ph/n-C <sub>18</sub> | CPI   | (Pr + n-C <sub>17</sub> )/<br>(Ph + n-C <sub>18</sub> ) |
|---------|-----------------------|-------|----------------------|----------------------|-------|---------------------------------------------------------|
| S1F1    | 10                    | 1.190 | 5.512                | 4.312                | 1.029 | 0.061                                                   |
| S2F1    | 10                    | 0.740 | 5.814                | 6.763                | 1.029 | 0.532                                                   |
| S3F1    | 8                     | 0.790 | 3.421                | 6.614                | 1.035 | 0.062                                                   |
| S4F1    | 5                     | 1.220 | 6.601                | 4.971                | 1.034 | 0.871                                                   |
| S5F1    | 2                     | 1.151 | 3.082                | 3.774                | 1.034 | 0.772                                                   |
| S6F1    | 1                     | 1.561 | 2.711                | 2.463                | 1.042 | 0.894                                                   |
| FCF1    | NA                    | 1.192 | 2.362                | 1.725                | 1.050 | 1.073                                                   |

$$CPI = \frac{\sum (nC_{11} \text{ to } nC_{27})}{\sum (nC_{10} \text{ to } nC_{26})}$$

\* F1 means saturate fraction of samples,

## References

1 A. Permanyer, L. Douifi, A. Lahcini, J. Lamontagne and J. Kister, *Fuel*, 2002, **81**, 861-866.
